# Supplementary material for: Crystal Structure of the Isopropylzinc Alkoxide of Pyrimidyl Alkanol: Mechanistic Insights for Asymmetric Autocatalysis with Amplification of Enantiomeric Excess
Source: PubMed Central journal article supplement — Angew Chem Int Ed Engl. 2015 Oct 23;54(50):15218–21. doi: 10.1002/anie.201508036 (PMC4691336; doi:10.1002/anie.201508036), 2015-10-23
Supplement: anie0054-15218-SD1.pdf [file anie0054-15218-SD1.pdf]

Supporting Information

**Crystal Structure of the Isopropylzinc Alkoxide of Pyrimidyl Alkanol:  
Mechanistic Insights for Asymmetric Autocatalysis with Amplification  
of Enantiomeric Excess**

*Arimasa Matsumoto,\* Takaaki Abe, Atsushi Hara, Takayuki Tobita, Taisuke Sasagawa,  
Tsuneomi Kawasaki,\* and Kenso Soai\**

anie\_201508036\_sm\_miscellaneous\_information.pdf

## **Supporting Information**

**Preparation of single crystal for X-ray analysis**

s2

**Details of Single Crystal X-ray Diffraction Analysis**

s3

**Details of DFT Calculation**

s13

## Preparation of single crystal for X-ray analysis

### Enantiopure Tetramer (Crystal A)

Single crystal of the enantiopure zinc alkoxide was made by the reaction with excess neat *i*-Pr<sub>2</sub>Zn (0.726 mmol, 8.4 equiv.) with enantiopure (*S*)-pyrimidylalkanol **2** (0.086 mmol) at room temperature, the alkanol was dissolved by heating at 80 °C and became a deep yellow viscous oil. The yellow single crystal was obtained after keeping the oil at room temperature for the 1-2 weeks.

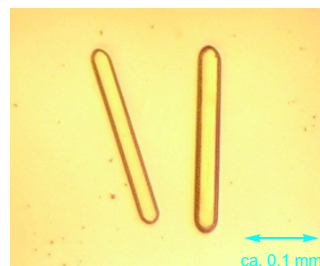

### Racemic Tetramer (Crystal B)

The zinc alkoxide of racemic alkanol was obtained by mixing a excess amount (0.726 mmol, 8.4 equiv.) of neat *i*-Pr<sub>2</sub>Zn with racemic 5-pyrimidyl alkanol **2** (0.086 mmol) in the presence of a small amount of toluene (0.1 mL) and keep the vial for one week in refrigerator. The yellow single crystals were appeared, after the slow evaporation of the solvent for 1–2 weeks.

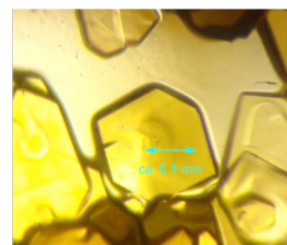

### Enantiopure Oligomer (Crystal C)

(*R*)-5-Pyrimidyl alkanol **2** (0.086 mmol) was dissolved in *i*-Pr<sub>2</sub>Zn (0.26 mmol, 3 equiv.) solution in toluene (0.2 mL) at room temperature. The single crystals were appeared after the slow evaporation of the solvent at room temperature without stirring for 1 month.

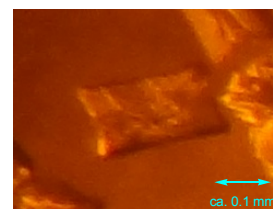

### Racemic Oligomer (Crystal D)

Racemic 5-pyrimidyl alkanol **2** (0.086 mmol) was dissolved in *i*-Pr<sub>2</sub>Zn (0.26 mmol, 3 equiv.) in the presence of THF (0.2 mL) at room temperature. The single crystals were appeared, after the slow evaporation of the solvent at room temperature without stirring for 2 weeks.

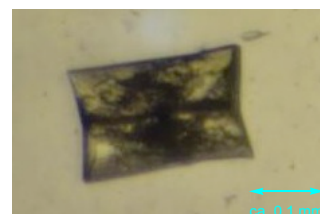

### Enantiopure Tetramer with THF (Crystal E)

Enantiopure (*R*)-5-pyrimidylalkanol (0.086 mmol) was mixed with neat *i*-Pr<sub>2</sub>Zn (0.726 mmol, 8.4 equiv.) and THF (0.2 mL) at room temperature, After keeping the oil at room temperature for the 1-2 weeks, the single crystal was obtained as yellow plates.

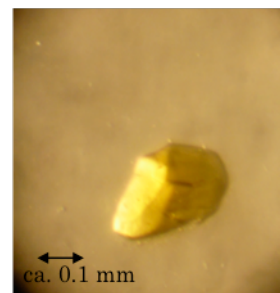

### Details of Single Crystal X-ray Diffraction Analysis

The crystal was covered by Nujol and immediately mounted on X-ray diffractometer and cooled to 100 K by nitrogen gas flow. The X-ray single crystal diffraction was recorded by Rigaku R-axis Rapid II imaging plate diffractometer equipped with Cu K $\alpha$  rotating anode X-ray tube (Crystal **A**) or Bruker Apex2 CCD diffractometer equipped with Mo K $\alpha$  rotating anode X-ray tube (Crystal **B**, **C**, **D**, **E**). Data collection, integration, and scaling, were carried out using the Rigaku RAPID AUTO or Bruker APEX II software. The diffraction was recorded at 100 K. Space groups were determined on the basis of systematic absences and intensity statistics, and the structures were solved by direct methods (*SHELXS*<sup>1</sup> or *SIR2011*<sup>2</sup>) and refined by full-matrix least-squares on  $F^2$  using *SHELXL-2014*<sup>1</sup> program. All nonhydrogen atoms were refined using anisotropic displacement parameters otherwise noted. Hydrogen atoms were placed in idealized positions and refined using a riding model.

It should be noted that the alkoxide crystal are air and moisture sensitive. In addition, due to a tendency to disorder in the weakly coordinated diisopropyl zinc, we cannot obtained the high-angle data ideally in some crystals.

---

<sup>1</sup> G. M. Sheldrick, *Acta Crystallogr. A*. **2008**, *64*, 112–122.

<sup>2</sup> M. C. Burla, R. Caliendo, M. Camalli, B. Carrozzini, G. L. Cascarano, C. Giacovazzo, M. Mallamo, A. Mazzone, G. Polidori, R. Spagna, *J. Appl. Crystallogr.* **2012**, *45*, 357–361.

**Table S1:** Crystal and refinement data for A–E

|                        | Crystal <b>A</b>                                                                 | Crystal <b>B</b>                                                               | Crystal <b>C</b>                                                              | Crystal <b>D</b>                                                              | Crystal <b>E</b>                                                                 |
|------------------------|----------------------------------------------------------------------------------|--------------------------------------------------------------------------------|-------------------------------------------------------------------------------|-------------------------------------------------------------------------------|----------------------------------------------------------------------------------|
|                        | CCDC 1420664                                                                     | CCDC 1420666                                                                   | CCDC 1420663                                                                  | CCDC 1420665                                                                  | CCDC 1420667                                                                     |
| Formula                | C <sub>104</sub> H <sub>188</sub> N <sub>8</sub> O <sub>4</sub> Zn <sub>10</sub> | C <sub>92</sub> H <sub>160</sub> N <sub>8</sub> O <sub>4</sub> Zn <sub>8</sub> | C <sub>34</sub> H <sub>52</sub> N <sub>4</sub> O <sub>2</sub> Zn <sub>2</sub> | C <sub>34</sub> H <sub>52</sub> N <sub>4</sub> O <sub>2</sub> Zn <sub>2</sub> | C <sub>112</sub> H <sub>204</sub> N <sub>8</sub> O <sub>6</sub> Zn <sub>10</sub> |
| Configuration          | only <i>S</i>                                                                    | racemic ( <i>meso</i> )                                                        | only <i>R</i>                                                                 | racemic ( <i>meso</i> )                                                       | only <i>R</i>                                                                    |
| Z                      | 4                                                                                | 4                                                                              | 2                                                                             | 4                                                                             | 2                                                                                |
| Space group            | <i>P</i> 2 <sub>1</sub> 2 <sub>1</sub> 2 <sub>1</sub>                            | <i>C</i> 2/ <i>c</i>                                                           | <i>P</i> 2 <sub>1</sub>                                                       | <i>P</i> 2 <sub>1</sub> / <i>c</i>                                            | <i>P</i> 2 <sub>1</sub>                                                          |
| <i>a</i> (Å)           | 16.8592(3)                                                                       | 29.93(2)                                                                       | 6.2846 (4)                                                                    | 6.3721 (9)                                                                    | 11.4499 (7)                                                                      |
| <i>b</i> (Å)           | 21.3576(4)                                                                       | 10.151 (8)                                                                     | 10.9782 (8)                                                                   | 10.7370 (15)                                                                  | 25.1924(15)                                                                      |
| <i>c</i> (Å)           | 33.1066(6)                                                                       | 34.38 (3)                                                                      | 25.3989(19)                                                                   | 25.601 (4)                                                                    | 22.7023 (14)                                                                     |
| $\alpha$ (deg.)        | 90                                                                               | 90                                                                             | 90                                                                            | 90                                                                            | 90                                                                               |
| $\beta$ (deg.)         | 90                                                                               | 104.154 (10)                                                                   | 95.355 (3)                                                                    | 96.730(2)                                                                     | 103.4220(10)                                                                     |
| $\gamma$ (deg.)        | 90                                                                               | 90                                                                             | 90                                                                            | 90                                                                            | 90                                                                               |
| Radiation              | Cu K $\alpha$                                                                    | Mo K $\alpha$                                                                  | Mo K $\alpha$                                                                 | Mo K $\alpha$                                                                 | Mo K $\alpha$                                                                    |
| Temp. (K)              | 100                                                                              | 100                                                                            | 100                                                                           | 100                                                                           | 100                                                                              |
| <i>R</i> <sub>T</sub>  | 0.0416                                                                           | 0.0533                                                                         | 0.0655                                                                        | 0.0527                                                                        | 0.0340                                                                           |
| <i>wR</i> <sub>2</sub> | 0.1110                                                                           | 0.1469                                                                         | 0.2147                                                                        | 0.1409                                                                        | 0.0810                                                                           |
| Flack parameter        | 0.022 (19)                                                                       | –                                                                              | 0.12(4)                                                                       | –                                                                             | 0.005(4)                                                                         |

### Enantiopure Tetramer (Crystal A)

The coordinated diisopropyl zinc molecules have disordered structure in the direction of isopropyl group. Disordered isopropyl group was refined with restrictions (SADI, ISOR, DELU). The details were embedded in CIF as a SHELXL res file. The checkCIF result contain only C level alert. The responses to the checkCIF results were shown bellow.

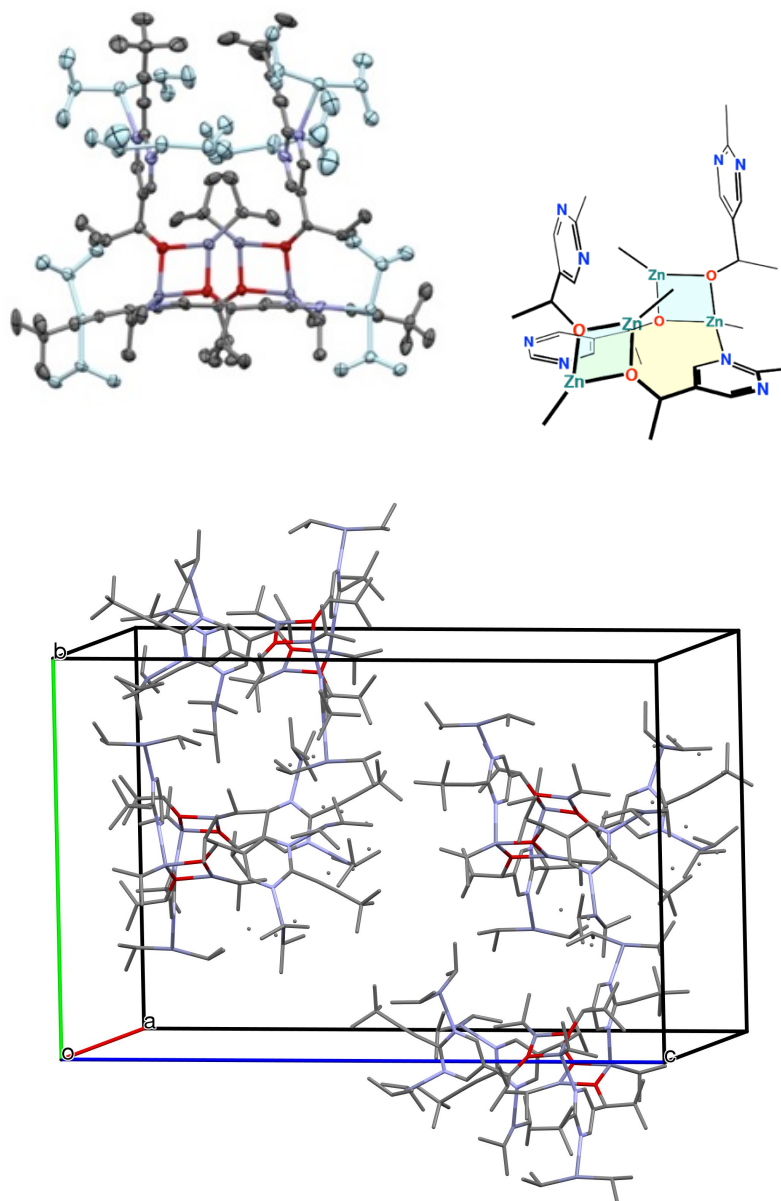

#### Checkcif Result and Response

**PLAT090\_ALERT\_3\_C** Poor Data / Parameter Ratio (Zmax > 18) ..... 9.72 Note

**PLAT220\_ALERT\_2\_C** Large Non-Solvent C Ueq(max)/Ueq(min) Range 5.7 Ratio

**PLAT222\_ALERT\_3\_C** Large Non-Solvent H Uiso(max)/Uiso(min) ... 6.9 Ratio

**PLAT234\_ALERT\_4\_C** Large Hirshfeld Difference Zn9 -- C93\_A .. 0.20 Ang.

**PLAT341\_ALERT\_3\_C** Low Bond Precision on C-C Bonds .... 0.0098 Ang.

**Author Response:** These alerts were probably caused by disorder of diisopropylzinc coordinated on pyrimidine ring. Although we try to model the disorder around diisopropylzinc, it was not possible to model all disorder.

PLAT242\_ALERT\_2\_C Low Ueq as Compared to Neighbors for ..... C25 Check

**Author Response:** C25 is a center carbon of *tert*-butyl group.

PLAT410\_ALERT\_2\_C Short Intra H...H Contact H7.. H21 .. 1.97 Ang.

**Author Response:** These short contact hydrogen atoms are placed on the inside of the 12-membered ring by Zn-N coordination.

## Racemic Tetramer (Crystal B)

The Crystal can be solved and refined without disorder structure nor restrictions.

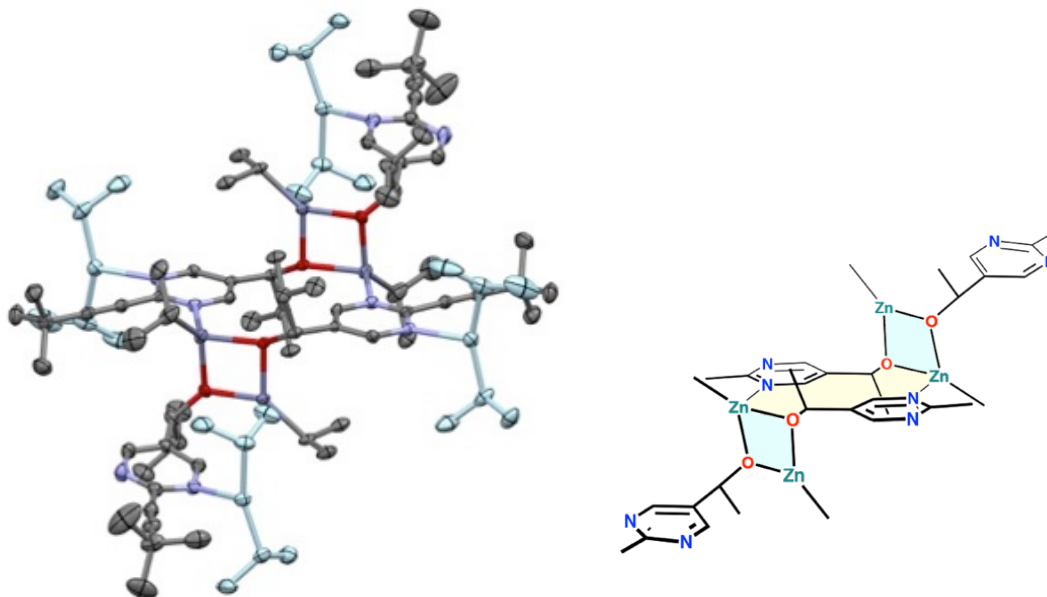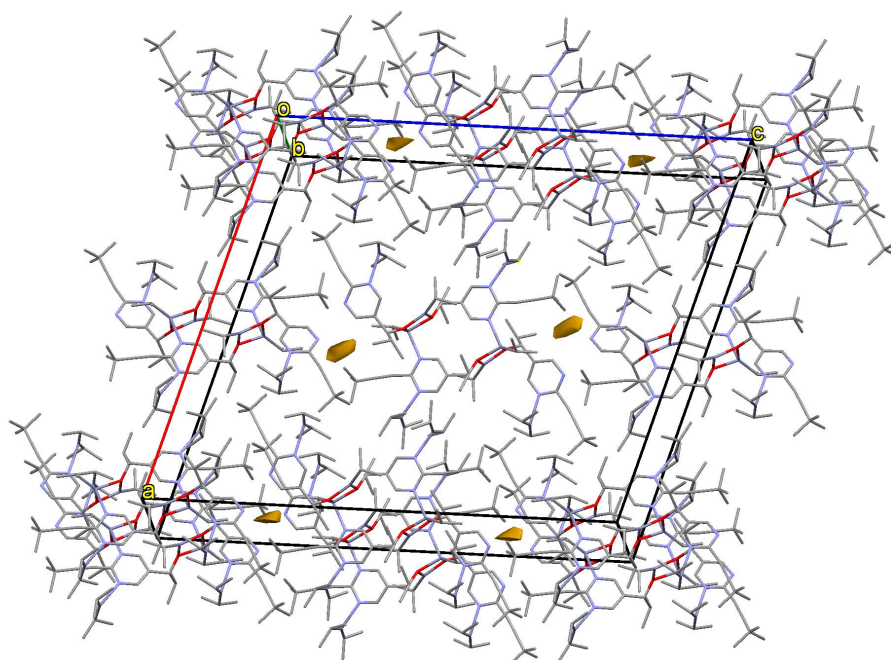

### Checkcif Result and Response

**PLAT220\_ALERT\_2\_C** Large Non-Solvent C Ueq(max)/Ueq(min) Range 5.7 Ratio

**PLAT222\_ALERT\_3\_C** Large Non-Solvent H Uiso(max)/Uiso(min) 6.2 Ratio

**PLAT341\_ALERT\_3\_C** Low Bond Precision on C-C Bonds 0.0061 Ang.

**PLAT601\_ALERT\_2\_C** Structure Contains Solvent Accessible VOIDS of 38 Ang<sup>3</sup>



**Author Response:** these alert probably caused by the unsolved disordered structure of *i*-Pr<sub>2</sub>Zn.

**PLAT242\_ALERT\_2\_C** Low Ueq as Compared to Neighbors for C7 Check

**Author Response:** C7 is a center carbon of *tert*-butyl group.

**PLAT242\_ALERT\_2\_C** Low Ueq as Compared to Neighbors for C34 Check

**Author Response:** C34 is a center carbon of *i*-propyl group.

**PLAT410\_ALERT\_2\_C** Short Intra H...H Contact H40.. H40

1.91 Ang.

**Author Response:** These short contact hydrogen atoms are placed on the inside of the 12-membered ring by Zn-N coordination.

### Chiral Oligomer (Crystal C)

The structure was refined without disorder nor restriction.

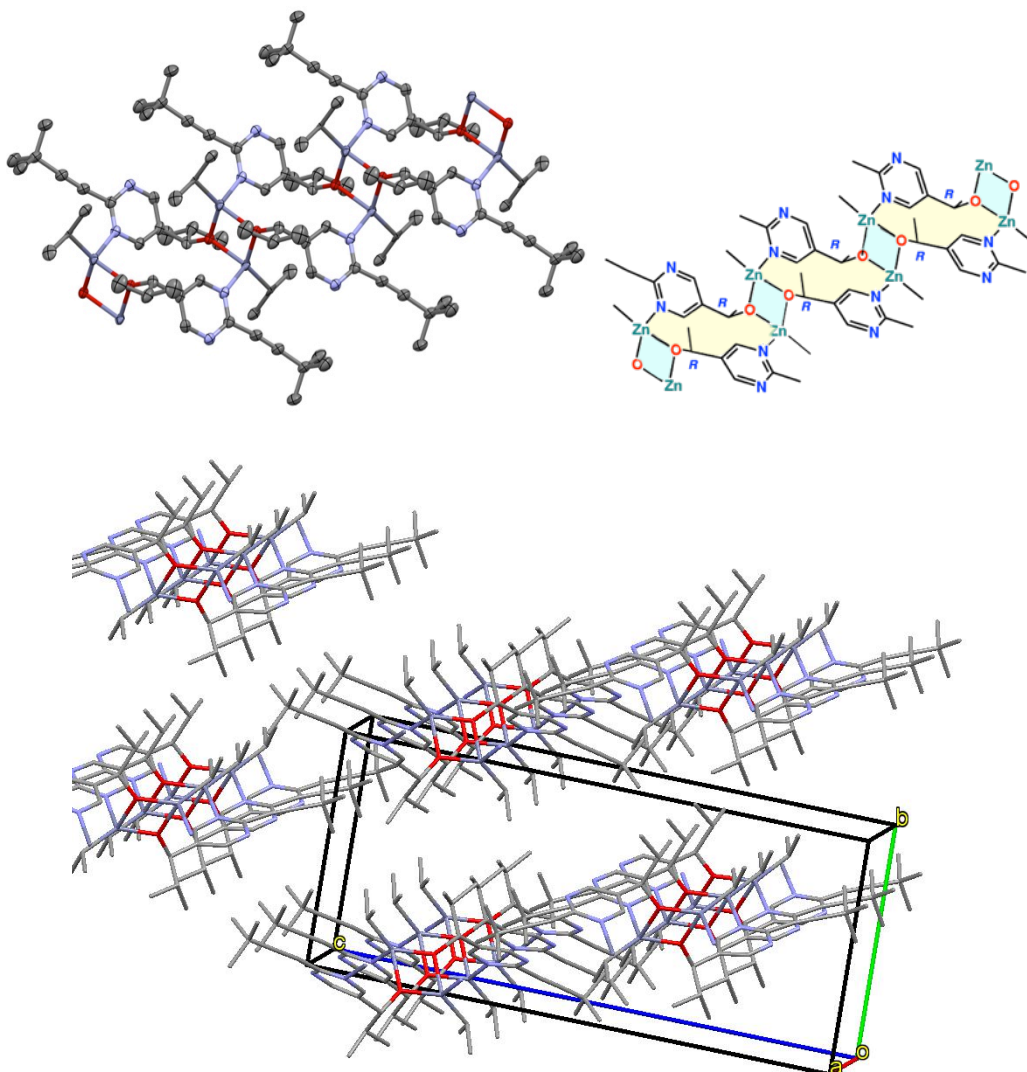

Checkcif Result and Response

**PLAT341\_ALERT\_3\_B** Low Bond Precision on C-C Bonds. 0.0172 Ang.

**PLAT029\_ALERT\_3\_C** \_diffn\_measured\_fraction\_theta\_full Low.. 0.976 Note

**PLAT090\_ALERT\_3\_C** Poor Data / Parameter Ratio (Zmax > 18) .... 8.60 Note

**Author Response:** These Alerts are due to the small crystal size and the quality of the measured crystal. Because of the instability of the alkoxide crystal and the high reactivity of diisopropyl zinc, we cannot obtain enough reflections from high 2theta region.

## Racemic Oligomer (Crystal D)

The structure seems contain disorder on the chiral center of the alkoxide such as (*R*)-alkoxid incorporate to the position which should be occupied by (*S*)-alkoxid. The disordered structure refined with restrictions (SADI, ISOR, DELU) and constrictions (EADP). The two B level alert in the checkCIF were probably caused by this disordered structure.

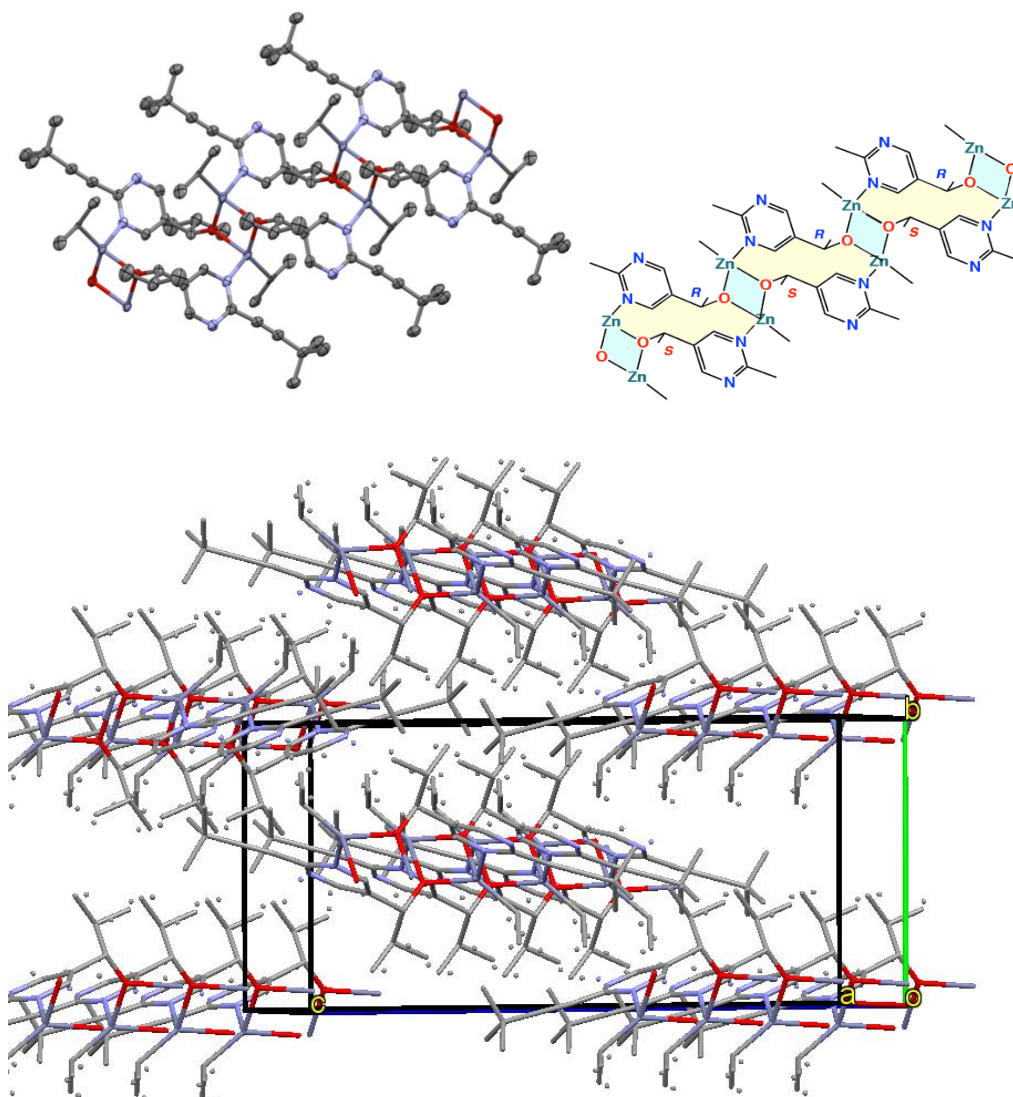

### Checkcif Result and Response

PLAT213\_ALERT\_2\_B Atom C11\_A has ADP max/min Ratio ..... 4.6 prolat

PLAT213\_ALERT\_2\_B Atom C11A\_B has ADP max/min Ratio .... 4.6 prolat

**Author Response:** C11 is a center carbon atom in *i*-Pr group, which have a disordered structure.

## Enantiopure Tetramer with THF (Crystal E)

The structure contains disorder in coordinating diisopropylzinc. The disordered structure refined with restrictions (ISOR).

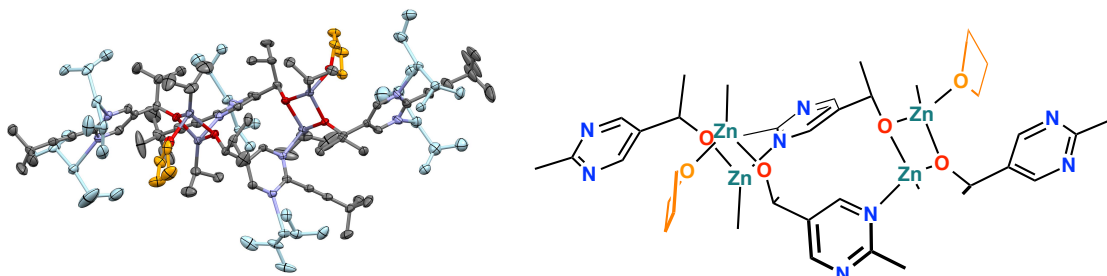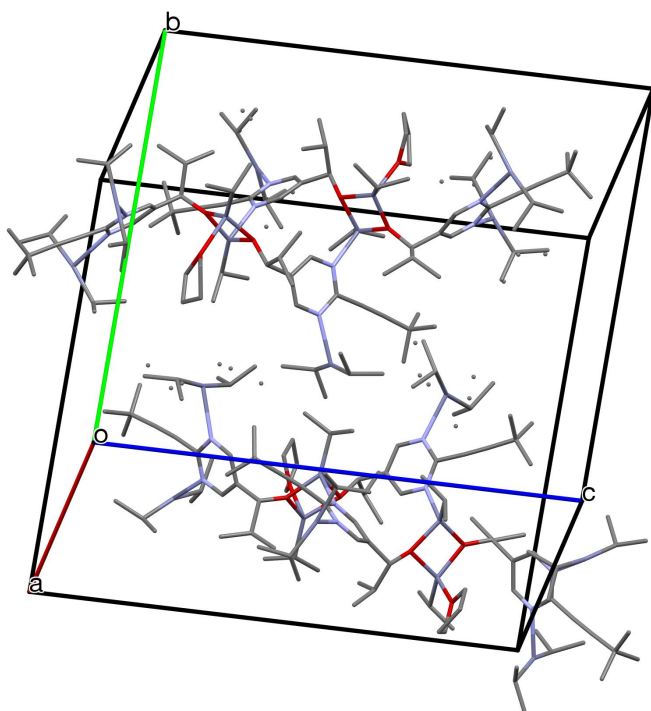

### Checkcif Result and Response

**PLAT213\_ALERT\_2\_B** Atom C14 has ADP max/min Ratio ... 4.1 prolat

**Author Response:** C14 is a terminal carbon of *t*-Bu group. This alert might be caused by unsolved disorder of *t*-Bu group.

**PLAT220\_ALERT\_2\_B** Large Non-Solvent C Ueq(max)/Ueq(min) Range =6.7 Ratio

**PLAT222\_ALERT\_3\_B** Large Non-Solvent H Uiso(max)/Uiso(min) ... 8.3 Ratio

**Author Response:** these alert probably caused by the unsolved disordered structure of *i*-Pr<sub>2</sub>Zn.

**PLAT213\_ALERT\_2\_C** Atom C11 has ADP max/min Ratio ..... 3.1 prolat

**Author Response:** C11 is placed at the *t*-Bu at the terminal of tetramer structure.

**PLAT213\_ALERT\_2\_C** Atom C56 has ADP max/min Ratio ..... 3.3 prolat

**PLAT213\_ALERT\_2\_C** Atom C70 has ADP max/min Ratio ..... 3.6 prolat

**Author Response:** C56 is placed at the terminal of *i*-Pr group and C70 is placed at terminal of *t*-Bu group.

Relatively large ADP max/min ratio might be caused by the rotation of *i*-Pr or *t*-Bu group.

**PLAT242\_ALERT\_2\_C** Low Ueq as Compared to Neighbors for ..... C11 Check

**PLAT242\_ALERT\_2\_C** Low Ueq as Compared to Neighbors for .... C54 Check

**PLAT242\_ALERT\_2\_C** Low Ueq as Compared to Neighbors for ..... C67 Check

**PLAT242\_ALERT\_2\_C** Low Ueq as Compared to Neighbors for ... C100 Check

**PLAT242\_ALERT\_2\_C** Low Ueq as Compared to Neighbors for ..... C103 Check

**Author Response:** C11 and C67 are center carbon atoms in *t*-Bu group. C54, C100, and C103 are center carbon atoms in *i*-Pr group.

**PLAT341\_ALERT\_3\_C** Low Bond Precision on C-C Bonds ..... 0.0075 Ang.

**Author Response:** these alert probably caused by the unsolved disordered structure of *i*-Pr<sub>2</sub>Zn.

## Details of DFT Calculation

The DFT calculation was performed start from the obtained structure in the X-ray diffraction analysis using Gaussian 09 (Revision C)<sup>3</sup>. The coordinated diisopropyl zinc was removed to simplify the calculation. The structure optimization and frequency analysis performed in B3LYP/6-31G(d) level and single point energy was calculated under B3LYP/6-311+G(d,p) level.

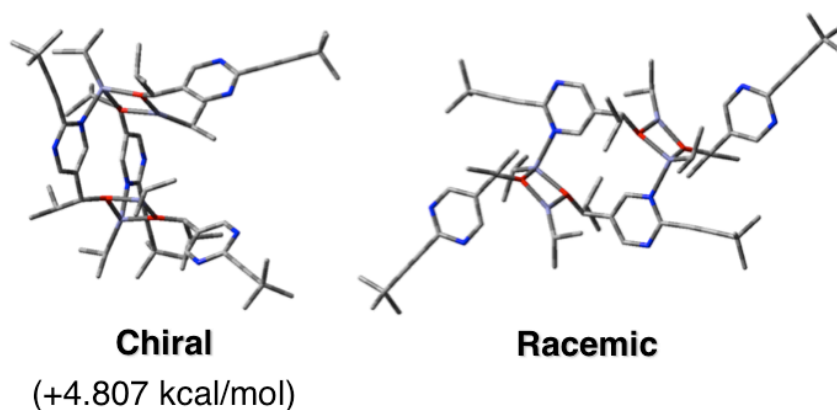

## Enantiopure Tetramer (Tetramer A')

---

<sup>3</sup> Gaussian 09, Revision C.01, M. J. Frisch, G. W. Trucks, H. B. Schlegel, G. E. Scuseria, M. A. Robb, J. R. Cheeseman, G. Scalmani, V. Barone, B. Mennucci, G. A. Petersson, H. Nakatsuji, M. Caricato, X. Li, H. P. Hratchian, A. F. Izmaylov, J. Bloino, G. Zheng, J. L. Sonnenberg, M. Hada, M. Ehara, K. Toyota, R. Fukuda, J. Hasegawa, M. Ishida, T. Nakajima, Y. Honda, O. Kitao, H. Nakai, T. Vreven, J. A. Montgomery, Jr., J. E. Peralta, F. Ogliaro, M. Bearpark, J. J. Heyd, E. Brothers, K. N. Kudin, V. N. Staroverov, R. Kobayashi, J. Normand, K. Raghavachari, A. Rendell, J. C. Burant, S. S. Iyengar, J. Tomasi, M. Cossi, N. Rega, J. M. Millam, M. Klene, J. E. Knox, J. B. Cross, V. Bakken, C. Adamo, J. Jaramillo, R. Gomperts, R. E. Stratmann, O. Yazyev, A. J. Austin, R. Cammi, C. Pomelli, J. W. Ochterski, R. L. Martin, K. Morokuma, V. G. Zakrzewski, G. A. Voth, P. Salvador, J. J. Dannenberg, S. Dapprich, A. D. Daniels, Ö. Farkas, J. B. Foresman, J. V. Ortiz, J. Cioslowski, and D. J. Fox, Gaussian, Inc., Wallingford CT, 2009.



## Racemic Tetramer (Tetramer B')

|    |            |           |           |    |            |           |           |   |            |           |           |
|----|------------|-----------|-----------|----|------------|-----------|-----------|---|------------|-----------|-----------|
| C  | -4.487200  | -1.693600 | -2.021200 | C  | 9.893500   | -1.332300 | 0.067300  | H | -4.477900  | -6.525100 | -2.140800 |
| C  | -3.800500  | -2.460800 | -3.160700 | C  | 12.215900  | -2.313700 | 0.986900  | H | -6.244700  | -6.596300 | -1.971900 |
| C  | -5.403300  | -0.597000 | -2.587900 | C  | 11.940100  | -3.180900 | 2.238200  | H | -5.442500  | -5.044900 | -2.303600 |
| C  | -3.175100  | 3.303000  | 1.847600  | C  | 13.161700  | -1.147000 | 1.355500  | H | -7.391800  | -5.604300 | 0.072800  |
| C  | -3.665300  | 4.412000  | 0.902100  | C  | 4.057200   | 4.963200  | -0.040300 | H | -6.438600  | -4.818400 | 1.347400  |
| C  | -1.777800  | 1.636900  | -1.573200 | C  | 5.370500   | 6.016400  | 1.752300  | H | -6.613500  | -4.039700 | -0.241100 |
| C  | -1.700500  | 0.920900  | -2.951800 | C  | 6.511600   | 5.009400  | -0.270800 | H | -14.023900 | 3.138500  | -0.187000 |
| C  | -1.555000  | 1.921900  | -4.107200 | C  | 12.864800  | -3.183600 | -0.116800 | H | -13.248700 | 2.009100  | 0.944900  |
| C  | -0.626600  | -0.170400 | -3.035400 | C  | 10.943100  | -1.772800 | 0.483500  | H | -12.517100 | 3.595400  | 0.637400  |
| C  | -0.482000  | 2.348700  | -1.201300 | C  | 5.133200   | 7.119600  | -0.515700 | H | -5.996800  | -7.722300 | 0.301400  |
| C  | -4.987800  | -0.665900 | 1.956300  | C  | 4.791200   | 0.309000  | -3.432800 | H | -4.227000  | -7.655500 | 0.158000  |
| C  | -3.454400  | -0.830600 | 3.969800  | C  | -0.279400  | 3.715700  | -1.420200 | H | -5.027000  | -6.962600 | 1.581200  |
| C  | -5.944800  | -0.713800 | 4.338600  | C  | 1.836500   | 3.635400  | -0.562300 | H | -4.727200  | 0.833600  | 3.469800  |
| C  | -6.309300  | -0.162900 | 1.399100  | C  | 5.259100   | 5.768400  | 0.228000  | H | 1.077100   | -4.300700 | 1.860000  |
| C  | -7.435100  | -0.976100 | 1.247400  | C  | 3.055600   | 4.315100  | -0.261600 | H | -1.902800  | 4.665900  | 3.001500  |
| C  | -6.489300  | 1.160900  | 0.987300  | C  | 1.804100   | -3.646600 | -2.492000 | H | -1.500900  | 2.959300  | 3.237700  |
| C  | -8.657200  | 0.760400  | 0.425100  | C  | 0.598100   | 1.695300  | -0.609500 | H | -1.032300  | 3.784100  | 1.746200  |
| C  | -9.906400  | 1.252600  | -0.076400 | N  | 1.741500   | 2.311900  | -0.278200 | H | -0.574100  | -0.613000 | 0.387200  |
| C  | -12.254000 | 2.164200  | -1.003600 | N  | 0.852100   | 4.356800  | -1.119900 | H | 5.149900   | 2.440800  | 1.512000  |
| C  | -11.998000 | 3.256300  | -2.068600 | N  | 7.618200   | -1.675200 | -0.520400 | H | 3.127200   | 1.849600  | 3.744000  |
| C  | -13.045700 | 0.993700  | -1.632700 | N  | 8.617900   | 0.492700  | -0.756900 | H | 4.540900   | 2.888300  | 3.890300  |
| C  | -4.044100  | -4.944100 | 0.036200  | O  | 2.183900   | -0.722200 | 0.545600  | H | 3.220100   | 3.337200  | 2.798000  |
| C  | -5.355200  | -5.991200 | -1.761600 | O  | 3.917000   | 0.244600  | -1.149000 | H | 4.845500   | -0.158300 | 3.121400  |
| C  | -6.497900  | -5.001300 | 0.268900  | Zn | 3.285300   | 1.068500  | 0.587800  | H | 5.992200   | 0.120500  | 1.811000  |
| C  | -13.058900 | 2.764000  | 0.174800  | Zn | 3.123100   | -1.501900 | -1.003800 | H | 6.131800   | 1.028000  | 3.323600  |
| C  | -10.965600 | 1.664600  | -0.497400 | H  | -5.142700  | -2.415300 | -1.507300 | H | 3.881800   | -3.191400 | -2.682800 |
| C  | -5.111200  | -7.107600 | 0.499200  | H  | -3.210800  | -3.309500 | -2.792200 | H | 2.972100   | -4.534100 | -0.072900 |
| C  | -4.780200  | -0.266000 | 3.442900  | H  | -4.531000  | -2.860800 | -3.885300 | H | 3.703000   | -5.351800 | -1.452500 |
| C  | 0.287800   | -3.689500 | 1.423700  | H  | -3.118200  | -1.821000 | -3.737000 | H | 4.647100   | -4.184900 | -0.518600 |
| C  | -1.827600  | -3.611700 | 0.564400  | H  | -6.123200  | -1.001800 | -3.319200 | H | 2.543300   | -2.399500 | 1.703000  |
| C  | -5.243100  | -5.752400 | -0.236000 | H  | -5.986200  | -0.095300 | -1.805800 | H | 2.685500   | -0.407500 | 3.054800  |
| C  | -3.044800  | -4.293500 | 0.260600  | H  | -4.837900  | 0.185200  | -3.114500 | H | 0.589300   | -2.402500 | 4.088200  |
| C  | -1.834000  | 3.691700  | 2.491200  | H  | -3.911300  | 3.227000  | 2.663000  | H | 2.345500   | -2.659100 | 4.086900  |
| C  | -0.592900  | -1.669300 | 0.616000  | H  | -2.980700  | 4.560100  | 0.055600  | H | 1.634600   | -1.376200 | 5.074800  |
| N  | -1.734900  | -2.287500 | 0.282900  | H  | -4.658500  | 4.203200  | 0.484400  | H | -0.376700  | -0.226100 | 3.027400  |
| N  | -0.842500  | -4.332100 | 1.121900  | H  | -3.731900  | 5.380900  | 1.422400  | H | 0.738400   | 0.759800  | 3.975100  |
| N  | -7.636100  | 1.639200  | 0.507500  | H  | -2.536800  | 2.427900  | -1.698600 | H | 0.715400   | 0.918400  | 2.218600  |
| N  | -8.602500  | -0.540900 | 0.769500  | H  | -2.678700  | 0.435000  | -3.050400 | H | 5.044500   | 1.787400  | -1.893500 |
| O  | -2.179700  | 0.750300  | -0.541200 | H  | -0.584100  | 2.432000  | -4.083100 | H | 3.282500   | 0.579900  | -4.982400 |
| O  | -3.906400  | -0.220000 | 1.158100  | H  | -1.628200  | 1.404800  | -5.070100 | H | 2.627400   | 0.592900  | -3.333200 |
| Zn | -3.278600  | -1.043400 | -0.580800 | H  | -2.340500  | 2.686800  | -4.082200 | H | 3.512800   | 1.998200  | -3.945700 |
| Zn | -3.126300  | 1.531700  | 1.002500  | H  | -0.707100  | -0.889200 | -2.214100 | H | 6.905000   | 0.273700  | -4.037300 |
| C  | 4.494500   | 1.719800  | 2.027100  | H  | -0.731600  | -0.731300 | -3.970600 | H | 5.762800   | 0.495300  | -5.369500 |
| C  | 3.809500   | 2.488400  | 3.166700  | H  | 0.383600   | 0.255800  | -3.024200 | H | 6.106500   | 1.838200  | -4.272800 |
| C  | 5.410600   | 0.623100  | 2.593600  | H  | -5.012600  | -1.768100 | 1.923200  | H | 7.431500   | 2.010500  | -1.488500 |
| C  | 3.153800   | -3.268400 | -1.860200 | H  | -3.268200  | -0.494500 | 4.996100  | H | 5.637400   | -1.862900 | -1.049900 |
| C  | 3.648000   | -4.385400 | -0.926300 | H  | -3.475900  | -1.928600 | 3.976300  | H | 11.267700  | -4.011200 | 1.999500  |
| C  | 1.783500   | -1.609100 | 1.578000  | H  | -2.612300  | -0.516800 | 3.347400  | H | 12.880900  | -3.595500 | 2.619700  |
| C  | 1.706900   | -0.892700 | 2.956400  | H  | -6.072400  | -1.803900 | 4.302500  | H | 11.478200  | -2.586200 | 3.033000  |
| C  | 1.560700   | -1.893300 | 4.111900  | H  | -5.748900  | -0.442100 | 5.381900  | H | 12.720000  | -0.515500 | 2.133100  |
| C  | 0.633800   | 0.199400  | 3.039700  | H  | -6.894300  | -0.254700 | 4.047200  | H | 14.113900  | -1.541300 | 1.729900  |
| C  | 0.488300   | -2.321900 | 1.206600  | H  | -7.393200  | -2.031300 | 1.519500  | H | 13.366900  | -0.518400 | 0.483000  |
| C  | 5.004700   | 0.686200  | -1.941000 | H  | -5.658300  | 1.863600  | 1.035500  | H | 5.453800   | 5.073200  | 2.300200  |
| C  | 3.474100   | 0.900700  | -3.952100 | H  | -11.434500 | 4.093600  | -1.644300 | H | 6.261800   | 6.619700  | 1.959800  |
| C  | 5.962500   | 0.750600  | -4.322800 | H  | -11.427200 | 2.854700  | -2.912300 | H | 4.494600   | 6.555600  | 2.127200  |
| C  | 6.319000   | 0.157500  | -1.390400 | H  | -12.953300 | 3.638000  | -2.448400 | H | 6.622800   | 4.050700  | 0.245600  |
| C  | 7.457100   | 0.951400  | -1.229300 | H  | -12.493500 | 0.551900  | -2.468600 | H | 6.452600   | 4.819800  | -1.348100 |
| C  | 6.478900   | -1.173600 | -0.994100 | H  | -13.233900 | 0.206700  | -0.895400 | H | 7.407500   | 5.610200  | -0.077700 |
| C  | 8.652700   | -0.813300 | -0.428100 | H  | -14.010700 | 1.354500  | -2.008400 | H | 13.813500  | -3.597400 | 0.245600  |



|   |           |           |           |   |           |           |           |   |          |           |           |
|---|-----------|-----------|-----------|---|-----------|-----------|-----------|---|----------|-----------|-----------|
| H | 12.209800 | -4.014900 | -0.397100 | H | 4.250900  | 7.673100  | -0.178900 | H | 1.009800 | -3.739400 | -1.739200 |
| H | 13.067700 | -2.591000 | -1.014800 | H | 4.721200  | -0.789200 | -3.474200 | H | 1.467200 | -2.908000 | -3.230600 |
| H | 6.021100  | 7.732100  | -0.320700 | H | -1.068000 | 4.327600  | -1.856900 | H | 0.577400 | 0.639600  | -0.378600 |
| H | 5.049600  | 6.968200  | -1.596800 | H | 1.862600  | -4.618000 | -3.008800 |   |          |           |           |
